# Supplementary material for: Dodder Parasitism Leads to the Enrichment of Pathogen Alternaria and Flavonoid Metabolites in Soybean Root
Source: MDPI journal article supplement (doi:10.3390/agronomy13061571), 2023-06-09
Supplement: s1 [file s1]

## Supplementary material

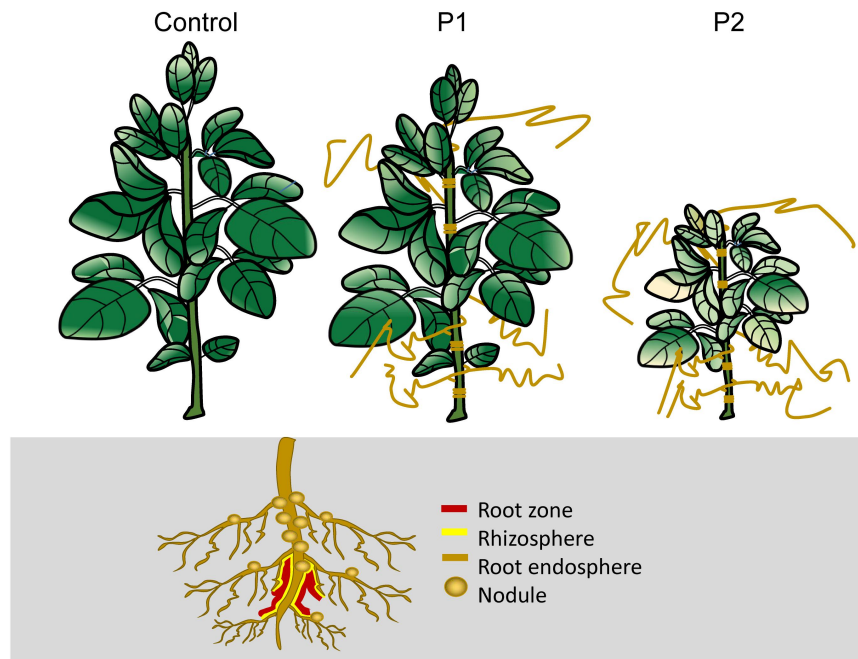

**Figure S1.** The sketch of three soybeans with three parasitism status (Control, P1, P2) and three rhizocompartments (root zone soil, rhizosphere soil and root endosphere).

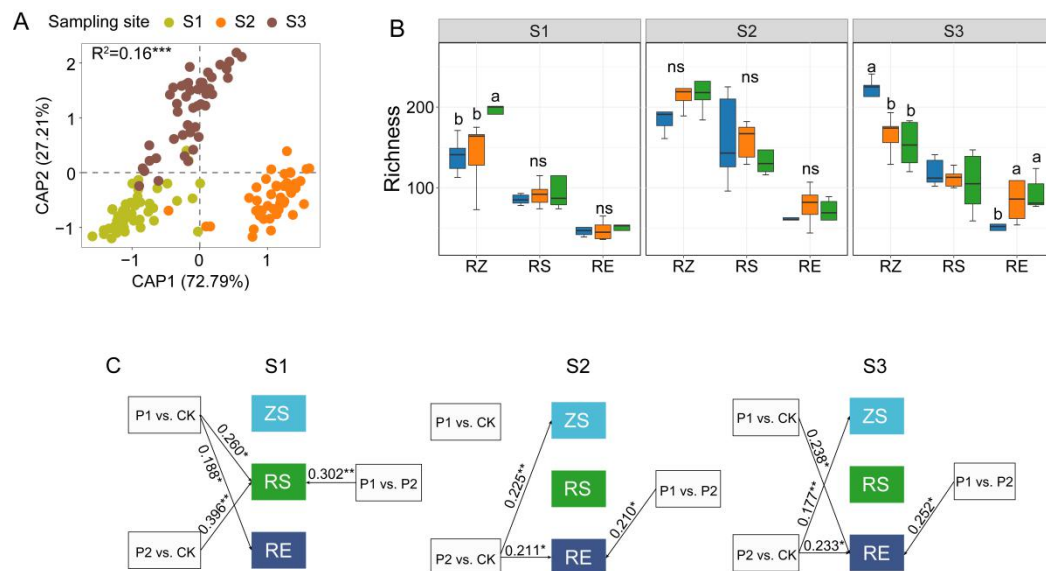

**Figure S2.** The effect of dodder parasitism on the root-associated fungal community of host in each sampling site. (A) Constrained analysis of principal coordinates (CAP) based on Bray-Curtis distances, showing the compositional variation explained by sampling site. (B) Boxplot showing differences in richness index among groups, with different letters indicating significant difference ( $P < 0.05$ ). (C) Different effects of parasitism (P1 vs. CK, P2 vs. CK, P1 vs. P2) on the fungal communities of soybean in each sampling site. BS, Bulk soil; ZS, root zone soil; RS, rhizosphere

soil; RE, root endosphere, CK, control.

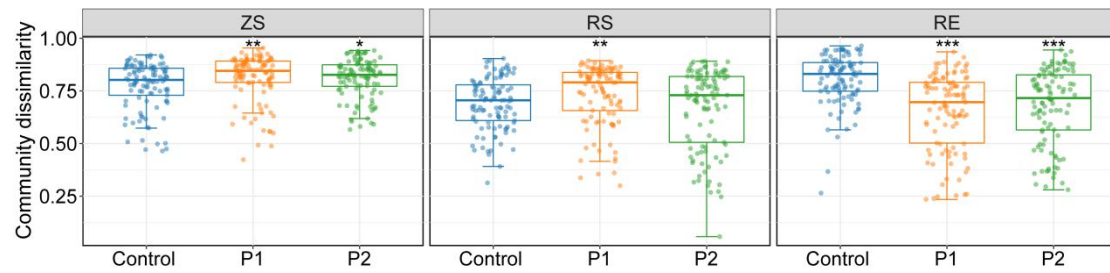

**Figure S3.** The variation in the dissimilarity (Bray-Curtis distance) of the fungal community in each root compartment among different parasitism statuses. ZS, root zone soil; RS, rhizosphere soil; RE, root endosphere.

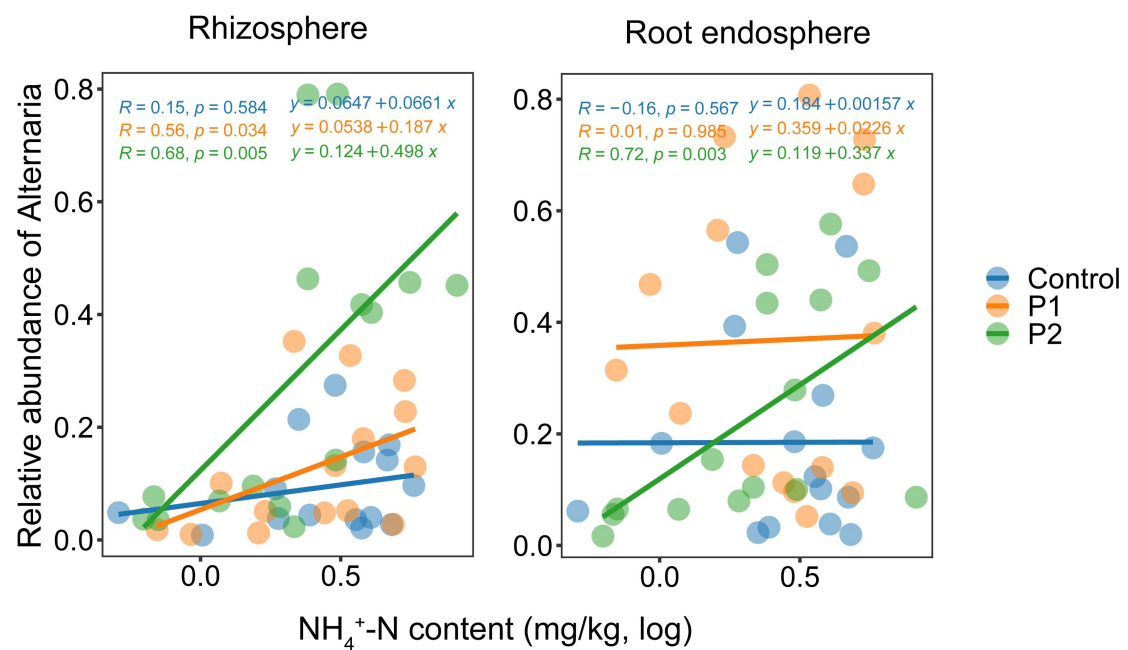

**Figure S4.** The relationship between soil  $\text{NH}_4^+\text{-N}$  content and the relative abundance of *Alternaria*. The line represents the linear regression of the ordinary least squares model.

**Table S1.** The core flavonoid metabolites that significantly enriched under both P1 and P2 conditions based on the differential enrichment analysis and the K-means clustering analysis.

| id         | Formula   | Compounds                                       | Class I    | Class II              | CAS        | kegg_map                        |
|------------|-----------|-------------------------------------------------|------------|-----------------------|------------|---------------------------------|
| mws1068    | C15H10O6  | Kaempferol (3,5,7,4'-Tetrahydroxyflavone)       | Flavonoids | Flavonols             | 520-18-3   | ko00941,ko00944,ko01100,ko01110 |
| pme1662    | C16H14O5  | 5,4'-Dihydroxy-7-methoxyflavanone (Sakuranetin) | Flavonoids | Flavanones            | 2957-21-3  | ko00941,ko01110                 |
| Lmqn003210 | C17H14O5  | 5-Hydroxy-6,7-dimethoxyflavone                  | Flavonoids | Flavones              | 740-33-0   | --                              |
| mws0066    | C16H12O7  | Isorhamnetin                                    | Flavonoids | Flavonols             | 480-19-3   | --                              |
| pmp001223  | C20H18O5  | Psoralenol                                      | Flavonoids | Isoflavones           | 70522-30-4 | --                              |
| mws1474    | C18H16O7  | 5,7-Dihydroxy-3',4',5'-trimethoxyflavone        | Flavonoids | Flavones              | 18103-42-9 | --                              |
| mws0055    | C20H20O7  | Tangeretin (4',5,6,7,8-Pentamethoxyflavone)     | Flavonoids | Flavones              | 481-53-8   | --                              |
| pmp000413  | C21H20O10 | Genistein-8-C-glucoside*                        | Flavonoids | Isoflavones           | 66026-80-0 | --                              |
| MWSHY0008  | C21H20O10 | Apigenin-6-C-glucoside (Isovitexin)*            | Flavonoids | Flavonoid carbonoside | 38953-85-4 | ko00944                         |
| Hmpp003270 | C21H20O11 | Luteolin-4'-O-glucoside*                        | Flavonoids | Flavones              | 6920-38-3  | --                              |
| MWSHY0136  | C21H20O11 | Kaempferol-3-O-glucoside*                       | Flavonoids | Flavonols             | 480-10-4   | ko00944,ko01110                 |
| pme1598    | C22H24O11 | Hesperetin-5-O-glucoside                        | Flavonoids | Flavanones            | 69651-80-5 | --                              |
| Hmcp002207 | C22H22O11 | Isorhamnetin-7-O-glucoside*                     | Flavonoids | Flavonols             | 6743-96-0  | --                              |

|               |                    |                                                           |            |                              |                |    |         |
|---------------|--------------------|-----------------------------------------------------------|------------|------------------------------|----------------|----|---------|
| Hmgrp002148   | 2<br>C22H22O1<br>2 | Nepetin-7-O-alloside*                                     | Flavonoids | Flavones                     | -              | -- |         |
| mws1292       | C26H28O1<br>4      | Isoschaftoside                                            | Flavonoids | Flavonoid<br>carbonosid<br>e | 52012-29-<br>0 | -- |         |
| Lmtp002474    | C26H28O1<br>4      | Apigenin-6-C-(2"-glucosyl)arabinoside                     | Flavonoids | Flavonoid<br>carbonosid<br>e | -              | -- |         |
| Hmgrp003641   | C28H32O1<br>4      | Chrysoeriol-6-C-rhamnoside-7-O-rhamnoside                 | Flavonoids | Flavonoid<br>carbonosid<br>e | -              | -- |         |
| mws1290       | C30H26O1<br>3      | Kaempferol-3-O-(6"-p-Coumaroyl)glucoside<br>(Tiliroside)* | Flavonoids | Flavonols                    | 20316-62-<br>5 | -- |         |
| Hmjn004446    | C30H26O1<br>3      | Luteolin-7-O-(6"-caffeoyl)rhamnoside*                     | Flavonoids | Flavones                     | -              | -- |         |
| MWSHY008<br>0 | C27H30O1<br>5      | Luteolin-7-O-neohesperidoside (Lonicerin)*                | Flavonoids | Flavones                     | 25694-72-<br>8 |    | ko00944 |
| MWSslk254     | C27H30O1<br>5      | Kaempferol-3-O-glucorhamnoside*                           | Flavonoids | Flavonols                    | 40437-72-<br>7 | -- |         |
| MWSHY006<br>1 | C27H30O1<br>5      | Kaempferol-3-O-neohesperidoside*                          | Flavonoids | Flavonols                    | 32602-81-<br>6 | -- |         |
| mws1661       | C28H32O1<br>5      | Diosmetin-7-O-rutinoside (Diosmin)                        | Flavonoids | Flavones                     | 520-27-4       | -- |         |
| Hmgrp002121   | C31H28O1<br>3      | Hispidulin-7-O-(6"-O-p-Coumaroyl)Glucoside                | Flavonoids | Flavones                     | -              | -- |         |

|            |           |                                                     |            |             |            |         |
|------------|-----------|-----------------------------------------------------|------------|-------------|------------|---------|
| Lmdp004267 | C30H26O14 | Quercetin-3-O-(6"-O-p-Coumaroyl)glucoside           | Flavonoids | Flavonols   | -          | --      |
| pme0001    | C28H34O15 | Hesperetin-7-O-neohesperidoside(Neohesperidin)      | Flavonoids | Flavanones  | 13241-33-3 | ko00941 |
| HJAP120    | C28H32O16 | Rhamnetin-3-O-Rutinoside*                           | Flavonoids | Flavonols   | -          | --      |
| Lmhp003217 | C28H32O16 | 2'-Hydoxy,5-methoxyGenistein-O-rhamnosyl-glucoside* | Flavonoids | Isoflavones | -          | --      |
